# Supplementary material for: Clinical Characteristics and Prognostic Factors of Lung Cancer in Korea: A Pilot Study of Data from the Korean Nationwide Lung Cancer Registry
Source: PubMed Central journal article supplement — Tuberc Respir Dis (Seoul). 2018 Jun 19;82(2):118–25. doi: 10.4046/trd.2017.0128 (PMC6435924; doi:10.4046/trd.2017.0128), 2018-06-19
Supplement: trd-82-118-s001.pdf [file trd-82-118-s001.pdf]

**Supplementary Table S1. Risk factor for mortality in patients with NSCLC according to clinical stage assessed by Cox proportional hazards model**

| Parameter                                          | Clinical stage I-II |              |         | Clinical stage III-IV |             |         |
|----------------------------------------------------|---------------------|--------------|---------|-----------------------|-------------|---------|
|                                                    | HR                  | 95% CI       | p-value | HR                    | 95% CI      | p-value |
| Univariate analysis                                |                     |              |         |                       |             |         |
| Age                                                | 1.099               | 1.041–1.159  | 0.001   | 1.035                 | 1.021–1.049 | < 0.001 |
| Male sex                                           | 2.221               | 0.868–5.682  | 0.096   | 1.582                 | 1.162–2.154 | 0.004   |
| Underweight patient (BMI <18.5 kg/m <sup>2</sup> ) | 2.844               | 0.831–9.729  | 0.096   | 1.998                 | 1.294–3.083 | 0.002   |
| Ever smoker                                        | 2.153               | 0.876–5.291  | 0.095   | 1.429                 | 1.054–1.936 | 0.022   |
| Asymptomatic patient                               | 0.396               | 0.117–1.337  | 0.136   | 0.349                 | 0.172–0.711 | 0.004   |
| Weight loss                                        | 7.980               | 2.681–23.756 | <0.001  | 1.107                 | 0.653–1.875 | 0.707   |
| Performance status 2–4                             | 13.451              | 3.927–46.072 | <0.001  | 1.856                 | 1.214–2.839 | 0.004   |
| Any treatment                                      | 0.063               | 0.023–0.172  | <0.001  | 0.417                 | 0.308–0.565 | <0.001  |
| Multivariate analysis                              |                     |              |         |                       |             |         |
| Any treatment                                      | 0.039               | 0.009–0.164  | <0.001  | 0.443                 | 0.295–0.665 | <0.001  |
| Age                                                | 1.062               | 0.999–1.129  | 0.054   | 1.024                 | 1.006–1.043 | 0.008   |
| Weight loss                                        | 6.698               | 1.808–24.810 | 0.004   | -                     | -           | -       |
| Male sex                                           | -                   | -            | -       | 1.449                 | 0.979–2.145 | 0.064   |
| Underweight patient (BMI <18.5 kg/m <sup>2</sup> ) | -                   | -            | -       | 1.761                 | 1.052–2.947 | 0.031   |
| Performance status 2–4                             | -                   | -            | -       | 1.610                 | 1.006–2.576 | 0.047   |
| Asymptomatic patient                               | -                   | -            | -       | 0.441                 | 0.175–1.108 | 0.082   |

NSCLC: non-small cell lung cancer; HR: hazard ratio; CI: confidence interval; BMI: body mass index.
